# Supplementary material
Source: PubMed Central journal article supplement (PMC5747503)
Supplement: NIHMS924546-supplement-Suppl_Table1.pdf [file NIHMS924546-supplement-Suppl_Table1.pdf]

Supplementary Table 1. Proteins included in the cladogram in Figure 1 in the main text (clockwise from top)

| Clade                                       | Protein    | Accession # | Source organism                                | Taxon              |
|---------------------------------------------|------------|-------------|------------------------------------------------|--------------------|
| <b>Chlorophyte cation channelrhodopsins</b> | CrChR1     | AF508965    | <i>Chlamydomonas reinhardtii</i>               | Chlorophyta        |
|                                             | CrChR2     | AF508966    | <i>Chlamydomonas reinhardtii</i>               | Chlorophyta        |
|                                             | PsChR2     | JX983143    | <i>Platymonas (Tetraselmis) subcordiformis</i> | Chlorophyta        |
|                                             | CaChR1     | JN596951    | <i>Chlamydomonas augustae</i>                  | Chlorophyta        |
|                                             | MvChR1     | JF922293    | <i>Mesostigma viride</i>                       | Streptophyta       |
| <b>Anion channelrhodopsins</b>              | GtACR1     | KP171708    | <i>Guillardia theta</i>                        | Cryptophyta        |
|                                             | GtACR2     | KP171709    | <i>Guillardia theta</i>                        | Cryptophyta        |
|                                             | PsuACR_973 |             | <i>Proteomonas sulcata</i>                     | Cryptophyta        |
|                                             | R2ACR_142  |             | <i>Rhodomonas</i> sp. CCAC1630                 | Cryptophyta        |
|                                             | PsuACR1    | KF992074    | <i>Proteomonas sulcata</i>                     | Cryptophyta        |
| <b>Enzymerhodopsins</b>                     | BeGC       | KF309499    | <i>Blastocladiella emersonii</i>               | Blastocladiomycota |
|                                             |            | AMAG_07932  | <i>Allomyces macrogynus</i>                    | Blastocladiomycota |
|                                             |            | AMAG_13844  | <i>Allomyces macrogynus</i>                    | Blastocladiomycota |
|                                             | CrHKR1     | AY272055    | <i>Chlamydomonas reinhardtii</i>               | Chlorophyta        |

|                       |           |              |                                        |                 |
|-----------------------|-----------|--------------|----------------------------------------|-----------------|
|                       |           | XP_002954798 | <i>Volvox carteri</i>                  | Chlorophyta     |
| Fungal rhodopsins     | NR        | AF135863     | <i>Neurospora crassa</i>               | Ascomycota      |
|                       |           | KPA37379     | <i>Fusarium langsethiae</i>            | Ascomycota      |
|                       | LR        | AF290180     | <i>Leptosphaeria maculans</i>          | Ascomycota      |
| Algal rhodopsin pumps | ARII      | HM070408     | <i>Acetabularia acetabulum</i>         | Chlorophyta     |
|                       | ARI       | HM070407     | <i>Acetabularia acetabulum</i>         | Chlorophyta     |
|                       | CsR       | XP_005646688 | <i>Coccomyxa subellipsoidea</i> C-169  | Chlorophyta     |
| Xenorhodopsins        | ASR       | BA000019     | <i>Anabaena (Nostoc) sp.</i> PCC 7120  | Cyanobacteria   |
|                       |           | WP_015955888 | <i>Cyanothece sp.</i> PCC 7424         | Cyanobacteria   |
|                       |           | EGQ43296     | <i>Nanosalina sp.</i>                  | Nanohaloarchaea |
|                       |           | EGQ40596     | <i>Nanosalinarum sp.</i>               | Nanohaloarchaea |
| Bacteriorhodopsins    | aR-3/Arch | GU045593     | <i>Halorubrum sodomense</i>            | Euryarchaeota   |
|                       | aR-2      | S56354       | <i>Halobacterium sp.</i> aus-2         | Euryarchaeota   |
|                       | HsBR      | V00474       | <i>Halobacterium salinarum</i>         | Euryarchaeota   |
|                       | cR-1      | D31880       | <i>Haloarcula argentinensis</i>        | Euryarchaeota   |
|                       | HwBR I    | CAJ51144     | <i>Haloquadratum walsbyi</i> DSM 16790 | Euryarchaeota   |
| Halorhodopsins        | HsHR      | WP_010902090 | <i>Halobacterium salinarum</i>         | Euryarchaeota   |
|                       | HwHR      | CAJ53165     | <i>Haloquadratum walsbyi</i> DSM 16790 | Euryarchaeota   |

|                                                                      |               |              |                                       |                |
|----------------------------------------------------------------------|---------------|--------------|---------------------------------------|----------------|
|                                                                      | <i>NpHR</i>   | P15647       | <i>Natronomonas pharaonis</i>         | Euryarchaeota  |
|                                                                      |               | AB009622     | <i>Halorubrum sodomense</i>           | Euryarchaeota  |
| <b>Haloarchaeal sensory rhodopsins</b>                               | <i>HsSRII</i> | WP_010903286 | <i>Halobacterium salinarum</i>        | Euryarchaeota  |
|                                                                      | <i>HhSRII</i> | CQH59952     | <i>Halobacterium hubeiense</i>        | Euryarchaeota  |
|                                                                      | <i>NpSRII</i> | CAI50508     | <i>Natronomonas pharaonis</i>         | Euryarchaeota  |
|                                                                      | <i>HsSRI</i>  | AAA72316     | <i>Halobacterium salinarum</i>        | Euryarchaeota  |
| <b>Eubacterial rhodopsin Na<sup>+</sup> and Cl<sup>-</sup> pumps</b> | <i>DeNaR</i>  | BAN14808     | <i>Dokdonia eikasta</i>               | Bacteroidetes  |
|                                                                      | <i>GNaR</i>   | WP_040506994 | <i>Gillisia limnaea</i>               | Bacteroidetes  |
|                                                                      | <i>IaNaR</i>  | WP_009036080 | <i>Indibacter alkaliphilus</i>        | Bacteroidetes  |
|                                                                      | <i>CIR</i>    | WP_052476770 | <i>Nonlabens marinus</i>              | Bacteroidetes  |
| <b>Proteorhodopsins</b>                                              | <i>XR</i>     | WP_011404249 | <i>Salinibacter ruber</i>             | Bacteroidetes  |
|                                                                      | <i>GR</i>     | BAC88139     | <i>Gloeobacter violaceus</i> PCC 7421 | Cyanobacteria  |
|                                                                      | <i>OR1</i>    | ABV22426     | <i>Oxyrrhis marina</i>                | Dinoflagellata |
|                                                                      | <i>BPR</i>    | AF349981     | uncultured bacterium                  | Proteobacteria |
|                                                                      | <i>GPR</i>    | AF279106     | uncultured bacterium                  | Proteobacteria |
| <b>Cryptophyte cation channelrhodopsins</b>                          | <i>GtCCR1</i> | KU761994     | <i>Guillardia theta</i>               | Cryptophyta    |
|                                                                      | <i>GtCCR2</i> | KU761992     | <i>Guillardia theta</i>               | Cryptophyta    |
|                                                                      | <i>PsuCCR</i> | KF992056     | <i>Proteomonas sulcata</i>            | Cryptophyta    |
|                                                                      | <i>GtCCR3</i> | KU761993     | <i>Guillardia theta</i>               | Cryptophyta    |
